# Supplementary material for: Metabolomics analysis of Lactobacillus plantarum ATCC 14917 adhesion activity under initial acid and alkali stress
Source: PubMed Central journal article supplement (PMC5967736; doi:10.1371/journal.pone.0196231), 2018-05-24
Supplement: pone.0196231.s003.pdf [file pone.0196231.s003.pdf]

**Table S3** The parameters (R2X and Q2) for evaluating the OPLS-DA model in this study

| <b>Samples</b> | <b>Model</b> | <b>R2X(cum)</b> | <b>Q2(cum)</b> |
|----------------|--------------|-----------------|----------------|
| B-A            | OPLS-DA      | 0.572           | 0.821          |
| C-A            | OPLS-DA      | 0.758           | 0.983          |

R2: represents the model interpretation rate; Q2: presentation model prediction ability  
R2 and Q2 are more closer to 1, the model is the more stable and reliable
