# Supplementary material for: Metabolomics analysis of Lactobacillus plantarum ATCC 14917 adhesion activity under initial acid and alkali stress
Source: PubMed Central journal article supplement (PMC5967736; doi:10.1371/journal.pone.0196231), 2018-05-24
Supplement: pone.0196231.s005.pdf [file pone.0196231.s005.pdf]

- TIC from QC01Pos-1.wiff (sample 1) - QC01
- TIC from QC02Pos.wiff (sample 1) - QC02
- TIC from QC03Pos.wiff (sample 1) - QC03
- TIC from QC04Pos.wiff (sample 1) - QC04

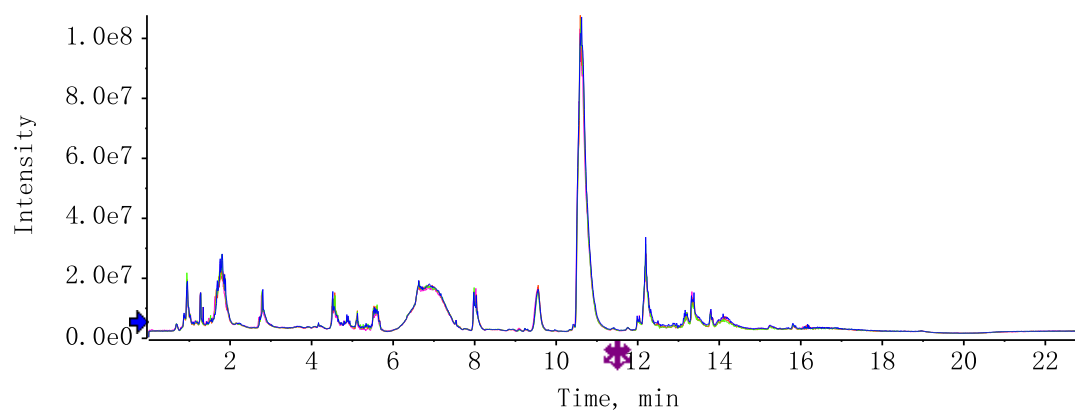

Figure S2. HILIC positive ion mode of QC samples superimposed TIC chromatogram
